# Supplementary material for: Development of an Intervention to Create a Supportive Work Environment for Employees with Chronic Conditions: An Intervention Mapping Approach
Source: Springer Nature journal article supplement (doi:10.1007/s10926-020-09885-z), 2020-03-21
Supplement: MOESM2 [file 17820714]

## Online resource 2

**Table 1** An example of a matrix of change objectives for employees with chronic conditions

| <b>Behavioral outcome: The employees with a chronic disease will exert self-control</b>                                                                                                                   |                                                                                                                                                                                                                                       |                                                                                                                                                                                                                                                                                                                                            |                                                                                                                                                                                                                                                                       |
|-----------------------------------------------------------------------------------------------------------------------------------------------------------------------------------------------------------|---------------------------------------------------------------------------------------------------------------------------------------------------------------------------------------------------------------------------------------|--------------------------------------------------------------------------------------------------------------------------------------------------------------------------------------------------------------------------------------------------------------------------------------------------------------------------------------------|-----------------------------------------------------------------------------------------------------------------------------------------------------------------------------------------------------------------------------------------------------------------------|
| <b>Performance objectives</b>                                                                                                                                                                             | <b>Personal determinants</b>                                                                                                                                                                                                          |                                                                                                                                                                                                                                                                                                                                            |                                                                                                                                                                                                                                                                       |
|                                                                                                                                                                                                           | <b>Attitude</b>                                                                                                                                                                                                                       | <b>Skills &amp; Self-efficacy</b>                                                                                                                                                                                                                                                                                                          | <b>Perceived norm</b>                                                                                                                                                                                                                                                 |
| 1. Decide in which cases disclosure of the chronic condition could be of help for sustainable employability and follow-up on these decisions (designating when to disclose, to whom and what information) | A1a. Express positive feelings about disclosing the condition and sharing information about the impact of working with the condition to work environment<br>A1b. State that disclosure helps in gaining adjustments and support       | S1a. Express confidence in the ability to talk about the condition at work<br>S1b. List strategies that can help with talking about the condition at work<br>S1c. Describe what information will be shared and to whom                                                                                                                     | P1a. Perceive the employer to be positive about disclosing the condition<br>P1b. Feel support from employer and colleagues to disclose the condition                                                                                                                  |
| 2. Ask for adjustments and support from employers, co-workers, the social environment, and health care providers                                                                                          | A2a. Express positive feelings about receiving support and adjustments in maintaining employment<br>A2b. State that asking for adjustments and support helps in fitting the job to the capacities and adjust to the condition at work | S2a. Express the confidence of recognizing the need for adjustments and support<br>S2b. Lists the available people (employers, co-workers, social environment, occupational physician and health care providers) and options for support<br>S2c. Lists the laws and policies that protect and facilitate employees with chronic conditions | P2a. Recognize that the employer is positive about asking for adjustments and support<br>P2b. Feel support from employer and colleagues to ask for adjustments and support<br>P2c. Feel support from policy and legislative system to ask for adjustments and support |
| 3. Make decisions with the aim of fitting the job to personal capacities and to maintain balance in life and follow-up on these decisions                                                                 | A3a. Express positive feelings about making decisions<br>A3b. State that decision making can help with energy management and                                                                                                          | S3a. Express confidence about the ability to weigh the options and make the right decisions                                                                                                                                                                                                                                                | P3a. Recognize that the employer is positive about making decisions that help to find the right balance in life<br>P3b. Feel support from employer and colleagues to                                                                                                  |

|                                                       |                                                                                                                                                                                                                                                                                                                        |                                                                                                                                                                                                                                                                                               |                                                                                                                                                                                           |
|-------------------------------------------------------|------------------------------------------------------------------------------------------------------------------------------------------------------------------------------------------------------------------------------------------------------------------------------------------------------------------------|-----------------------------------------------------------------------------------------------------------------------------------------------------------------------------------------------------------------------------------------------------------------------------------------------|-------------------------------------------------------------------------------------------------------------------------------------------------------------------------------------------|
|                                                       | maintaining balance in work, health and personal life                                                                                                                                                                                                                                                                  | S3b. Lists his/her priorities with regard to work, health and personal life<br>S3c. List the needed information for decision making                                                                                                                                                           | make decisions that help to find the right balance in life                                                                                                                                |
| 4. Manage limitations and respond to symptoms at work | A4a. Express positive feelings about taking responsibility to manage the symptoms and limitations at work<br>A4b. State the consequences of not managing the symptoms and limitations at work<br>A4c. State that managing symptoms and limitations will help in staying productive and prevent progression of symptoms | S4a. Express confidence in the ability to recognize symptoms and limitations<br>S4b. Express confidence in the ability to manage the symptoms and limitations at work<br>S4c. List the symptoms that require actions<br>S4d. Recognizes problems in managing symptoms and limitations at work | P4a. Recognize that the employer is positive about managing symptoms and limitations at work<br>P4b. Feel support from employer and colleagues to manage symptoms and limitations at work |

**Table 2** An example of a matrix of change objectives for OPs

| <b>Environmental outcome: occupational physicians collaborate with the work environment in supporting employees with chronic conditions to exert self-control</b> |                                                                                                                          |                                                                                                                                                                                |                                                                                                               |
|-------------------------------------------------------------------------------------------------------------------------------------------------------------------|--------------------------------------------------------------------------------------------------------------------------|--------------------------------------------------------------------------------------------------------------------------------------------------------------------------------|---------------------------------------------------------------------------------------------------------------|
| <b>Performance objectives</b>                                                                                                                                     | <b>Personal determinants</b>                                                                                             |                                                                                                                                                                                |                                                                                                               |
|                                                                                                                                                                   | <b>Attitude</b>                                                                                                          | <b>Skills &amp; Self-efficacy</b>                                                                                                                                              | <b>Perceived norm</b>                                                                                         |
| 1. OP creates awareness within the organization of the need for an organizational policy to facilitate employees with chronic conditions staying at work          | A1a. Express positive feelings about creating awareness within the organization for the need of an organizational policy | S1a. Express confidence about identifying relevant stakeholders in the organization<br>S1b. Express confidence in getting across the importance of an organizational policy to | P1a. Recognize that the employer is positive about exerting self-control by employees with chronic conditions |

|                                                                                                                                                                                        |                                                                                                                                                                                                                                                                                        |                                                                                                                                                          |                                                                                                                                                                                                                                                                    |
|----------------------------------------------------------------------------------------------------------------------------------------------------------------------------------------|----------------------------------------------------------------------------------------------------------------------------------------------------------------------------------------------------------------------------------------------------------------------------------------|----------------------------------------------------------------------------------------------------------------------------------------------------------|--------------------------------------------------------------------------------------------------------------------------------------------------------------------------------------------------------------------------------------------------------------------|
|                                                                                                                                                                                        |                                                                                                                                                                                                                                                                                        | relevant stakeholders in the organization                                                                                                                |                                                                                                                                                                                                                                                                    |
| 2. OP guides the employer in exploring organizational barriers which inhibit employees with chronic conditions from exerting self-control                                              | A2a. Express positive feelings about identifying barriers for exerting self-control by employees with chronic conditions<br>A2b. State that identifying barriers for exerting self-control by employees with chronic conditions is the first step in creating an organizational policy | S2a. Express confidence about the ability to guide the employer with identifying barriers for exerting self-control by employees with chronic conditions | P2a. Recognize that the employer is positive about identifying barriers for exerting self-control by employees with chronic conditions<br>P2b. Feel support from employer in identifying barriers for exerting self-control by employees with chronic conditions   |
| 3. OP guides the employer in exploring possible solutions for these organizational barriers which inhibit employees with chronic conditions from exerting self-control                 | A3a. Express positive feelings about finding effective solutions for identified barriers<br>A3b. State that these solutions can help with exerting self-control by employees with chronic conditions and can help in creating an organizational policy                                 | S3a. Express confidence about the ability to guide the employer with thinking up effective solutions                                                     | P3a. Recognize that the employer is positive about thinking up solutions for exerting self-control by employees with chronic conditions<br>P3b. Feel support from employer in thinking up solutions for exerting self-control by employees with chronic conditions |
| 4. OP helps to create an organizational policy and a supportive work environment to facilitate the ability of employees with chronic conditions to exert self-control and stay at work | A4a. Express positive feelings about helping employer in creating an organizational policy<br>A4b. State that an organizational policy can facilitate exerting self-control by employees with chronic conditions                                                                       | S4a. Express confidence in the ability to help create an organizational policy together with employer                                                    | P4a. Recognize that the employer is positive about creating an organizational policy                                                                                                                                                                               |
