# Supplementary material for: Development of an Intervention to Create a Supportive Work Environment for Employees with Chronic Conditions: An Intervention Mapping Approach
Source: Springer Nature journal article supplement (doi:10.1007/s10926-020-09885-z), 2020-03-21
Supplement: MOESM3 [file 17820714]

### Online resource 3

**Table 1** Theoretical methods for the selected determinants

| <b>Change objective<br/>(per determinant)</b> | <b>Theoretical methods</b>                | <b>Parameters</b>                                                                                                          | <b>Practical applications</b>                                                                                                                                            |
|-----------------------------------------------|-------------------------------------------|----------------------------------------------------------------------------------------------------------------------------|--------------------------------------------------------------------------------------------------------------------------------------------------------------------------|
| CO A1-4                                       | Shifting perspectives                     | Requires social and organizational skills                                                                                  | OPs form workgroups and organize meetings with different stakeholders (e.g. employees, HR managers and supervisors) in an organization                                   |
| CO A1-4                                       | Environmental re-evaluation               | Stimulation of cognitive as well as affective appraisal for improving appraisal and empathy skills                         | Stakeholders in the workgroup discuss the benefits of exerting self-control at work for employees with chronic conditions and their employers                            |
| CO A2; S2; P2                                 | Organizational diagnosis and feedback     | Requires consciousness raising, feedback and communication skills                                                          | The workgroup discusses and identifies potential barriers to exert self-control within their organization from different stakeholders' perspectives                      |
| CO A3; S3; P3                                 | Participatory problem solving             | Requires willingness to accept working group participants as equals; requires creative thinking and appropriate motivation | The workgroup discusses and brainstorms about possible solutions for these barriers to better support their employees in exerting self-control within their organization |
| CO A4; S4; P4                                 | Structural redesign<br><br>Systems change | Requires management authority and agreement<br><br>Methods and actors depend on the level of the system                    | Agreed solutions are implemented in new or existing policy within a certain timeframe                                                                                    |
