# Supplementary material for: Development of an Intervention to Create a Supportive Work Environment for Employees with Chronic Conditions: An Intervention Mapping Approach
Source: Springer Nature journal article supplement (doi:10.1007/s10926-020-09885-z), 2020-03-21
Supplement: MOESM4 [file 17820714]

## Online resource 4

Fig 1. Examples of forms, used to guide the Participatory Approach

**Form 3** 

### Barriers for exerting self-control?

|                  |   |               |
|------------------|---|---------------|
| <b>Barrier 1</b> | → | <b>Causes</b> |
|                  |   |               |
|                  |   |               |
|                  |   |               |

  

|                  |   |               |
|------------------|---|---------------|
| <b>Barrier 2</b> | → | <b>Causes</b> |
|                  |   |               |
|                  |   |               |
|                  |   |               |

  

|                  |   |               |
|------------------|---|---------------|
| <b>Barrier 3</b> | → | <b>Causes</b> |
|                  |   |               |
|                  |   |               |
|                  |   |               |

**Form 4** 

### What are possible solutions?

|                  |                     |
|------------------|---------------------|
| <b>Barrier 1</b> |                     |
| <b>Solutions</b> | <b>Feasibility?</b> |
|                  |                     |
|                  |                     |
|                  |                     |

  

|                  |                     |
|------------------|---------------------|
| <b>Barrier 2</b> |                     |
| <b>Solutions</b> | <b>Feasibility?</b> |
|                  |                     |
|                  |                     |
|                  |                     |
